# Supplementary material
Source: Springer Nature journal article supplement (http://www.springermedizin.de/resource/supplementary/13049_2009_62_MOESM1_ESM.pdf/9665800)

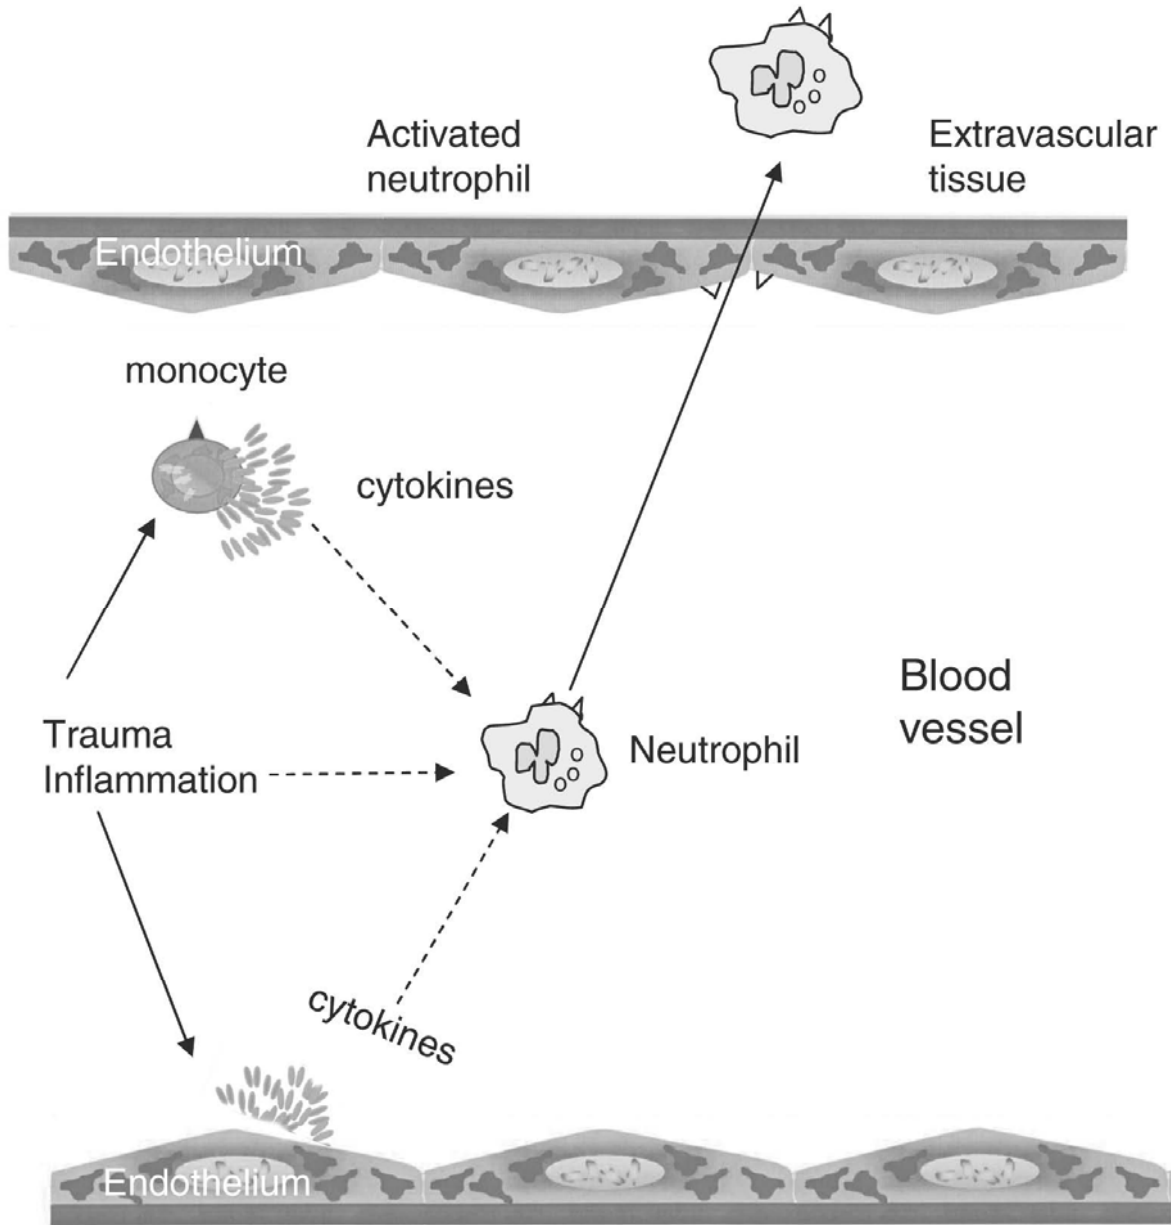

Supplement: MOESM1 [file 9665800]
